# Supplementary material for: Amino acid deprivation triggers a novel GCN2-independent response leading to the transcriptional reactivation of non-native DNA sequences
Source: PubMed Central journal article supplement (PMC6051655; doi:10.1371/journal.pone.0200783), 2018-07-18

# S1 Fig

A

| Cluster 1<br>UP-regulated progressively |               |               | Cluster 2<br>UP-regulated at early time points |               |               | Cluster 3<br>DOWN-regulated progressively |               |               | Cluster 4<br>DOWN-regulated at late time points |               |               |
|-----------------------------------------|---------------|---------------|------------------------------------------------|---------------|---------------|-------------------------------------------|---------------|---------------|-------------------------------------------------|---------------|---------------|
| Repeat Name                             | Repeat Family | Repeat Class  | Repeat Name                                    | Repeat Family | Repeat Class  | Repeat Name                               | Repeat Family | Repeat Class  | Repeat Name                                     | Repeat Family | Repeat Class  |
| Charlie10b                              | hAT-Charlie   | DNA           | Arthur1A                                       | hAT-Tip100    | DNA           | MER106A                                   | hAT-Charlie   | DNA           | Charlie24                                       | hAT-Charlie   | DNA           |
| Charlie1                                | hAT-Charlie   | DNA           | Charlie3                                       | hAT-Charlie   | DNA           | MER30                                     | hAT-Charlie   | DNA           | Cheshire                                        | hAT-Charlie   | DNA           |
| MER45B                                  | hAT-Tip100    | DNA           | Charlie6                                       | hAT-Charlie   | DNA           | MER94                                     | hAT-Blackjack | DNA           | DNA1_Mam                                        | TcMar         | DNA           |
| L1M2b                                   | L1            | LINE          | Tigger5                                        | TcMar-Tigger  | DNA           | Tigger10                                  | TcMar-Tigger  | DNA           | MER75A                                          | PiggyBac      | DNA           |
| L1M3b                                   | L1            | LINE          | L1MA5                                          | L1            | LINE          | Tigger16b                                 | TcMar-Tigger  | DNA           | MER91B                                          | hAT-Tip100    | DNA           |
| L1M3f                                   | L1            | LINE          | HERVK13-int                                    | ERVK          | LTR           | Tigger4b                                  | TcMar-Tigger  | DNA           | MER97b                                          | hAT-Tip100    | DNA           |
| L1P4d                                   | L1            | LINE          | HUERS-P3-int                                   | ERV1          | LTR           | Tigger9a                                  | TcMar-Tigger  | DNA           | Tigger13a                                       | TcMar-Tigger  | DNA           |
| Harlequin-int                           | ERV1          | LTR           | LTR14B                                         | ERVK          | LTR           | UCON23                                    | DNA?          | DNA?          | Tigger2b_Pri                                    | TcMar-Tigger  | DNA           |
| HERV15-int                              | ERV1          | LTR           | LTR16A1                                        | ERV1          | LTR           | AluSc                                     | Alu           | SINE          | AluYh9                                          | Alu           | SINE          |
| HERVK14-int                             | ERVK          | LTR           | LTR27B                                         | ERV1          | LTR           | CR1_Mam                                   | CR1           | LINE          | HAL1                                            | L1            | LINE          |
| HERVL18-int                             | ERV1          | LTR           | LTR30                                          | ERV1          | LTR           | L1M3                                      | L1            | LINE          | L1M2                                            | L1            | LINE          |
| HERVL-int                               | ERV1          | LTR           | LTR33                                          | ERV1          | LTR           | L2b                                       | L2            | LINE          | L1M3de                                          | L1            | LINE          |
| LOR1-int                                | ERV1          | LTR           | LTR4                                           | ERV1          | LTR           | L3b                                       | CR1           | LINE          | L1M4                                            | L1            | LINE          |
| LTR12B                                  | ERV1          | LTR           | LTR5_Hs                                        | ERVK          | LTR           | L4                                        | RTE           | LINE          | L1M5                                            | L1            | LINE          |
| LTR17                                   | ERV1          | LTR           | LTR76                                          | ERV1          | LTR           | LTR19A                                    | ERV1          | LTR           | L1MA2                                           | L1            | LINE          |
| LTR39                                   | ERV1          | LTR           | LTR89                                          | ERV1?         | LTR           | LTR32                                     | ERV1          | LTR           | L1MA3                                           | L1            | LINE          |
| LTR41B                                  | ERV1          | LTR           | MER34A1                                        | ERV1          | LTR           | LTR35                                     | ERV1          | LTR           | L1MA6                                           | L1            | LINE          |
| LTR51                                   | ERV1          | LTR           | MER68B                                         | ERV1          | LTR           | LTR72B                                    | ERV1          | LTR           | L1MA9                                           | L1            | LINE          |
| LTR61                                   | ERV1          | LTR           | MER87B                                         | ERV1          | LTR           | LTR90A                                    | LTR           | LTR           | L1MB1                                           | L1            | LINE          |
| LTR7                                    | ERV1          | LTR           | MLT1E1A                                        | ERV1-MaLR     | LTR           | MSTD                                      | ERV1-MaLR     | LTR           | L1MB2                                           | L1            | LINE          |
| LTR77                                   | ERV1          | LTR           | PRIMA41-int                                    | ERV1          | LTR           | LSU-rRNA_Hsa                              | rRNA          | rRNA          | L1MB3                                           | L1            | LINE          |
| LTR78                                   | ERV1          | LTR           | HSAT4                                          | centr         | Satellite     | (CAAAA)n                                  | Simple_repeat | Simple_repeat | L1MC1                                           | L1            | LINE          |
| LTR82A                                  | ERV1          | LTR           | (CTGGGG)n                                      | Simple_repeat | Simple_repeat | (CAGGG)n                                  | Simple_repeat | Simple_repeat | L1MD2                                           | L1            | LINE          |
| LTR8                                    | ERV1          | LTR           | tRNA-Gln-CAA                                   | tRNA          | tRNA          | (CAT)n                                    | Simple_repeat | Simple_repeat | L1ME1                                           | L1            | LINE          |
| LTR85b                                  | Gypsy?        | LTR           | tRNA-Gly-GGA                                   | tRNA          | tRNA          | (CCTG)n                                   | Simple_repeat | Simple_repeat | L1ME2z                                          | L1            | LINE          |
| LTR86B2                                 | ERV1          | LTR           | tRNA-Ser-TCA                                   | tRNA          | tRNA          | (CTTG)n                                   | Simple_repeat | Simple_repeat | L1ME3F                                          | L1            | LINE          |
| LTR8a                                   | Gypsy?        | LTR           | UCON4                                          | Unknown       | Unknown       | (TA)n                                     | Simple_repeat | Simple_repeat | L1ME5                                           | L1            | LINE          |
| LTR9                                    | ERV1          | LTR           |                                                |               |               | (TATAG)n                                  | Simple_repeat | Simple_repeat | L1MEa                                           | L1            | LINE          |
| MamGyp-int                              | Gypsy         | LTR           |                                                |               |               | U17                                       | snRNA         | snRNA         | L1MEc                                           | L1            | LINE          |
| MER110A                                 | ERV1          | LTR           |                                                |               |               | UCON22                                    | Unknown       | Unknown       | L1MEe                                           | L1            | LINE          |
| MER110-int                              | ERV1          | LTR           |                                                |               |               |                                           |               |               | L1MEg                                           | L1            | LINE          |
| MER41E                                  | ERV1          | LTR           |                                                |               |               |                                           |               |               | L1MEg2                                          | L1            | LINE          |
| MER4-int                                | ERV1          | LTR           |                                                |               |               |                                           |               |               | L1P5                                            | L1            | LINE          |
| MER50B                                  | ERV1          | LTR           |                                                |               |               |                                           |               |               | L1PA14                                          | L1            | LINE          |
| MER52D                                  | ERV1          | LTR           |                                                |               |               |                                           |               |               | L1PB3                                           | L1            | LINE          |
| MER57-int                               | ERV1          | LTR           |                                                |               |               |                                           |               |               | L1PB4                                           | L1            | LINE          |
| MER65-int                               | ERV1          | LTR           |                                                |               |               |                                           |               |               | Mam_R4                                          | Dong-R4       | LINE          |
| MER67C                                  | ERV1          | LTR           |                                                |               |               |                                           |               |               | HERV1-int                                       | ERV1          | LTR           |
| MER84-int                               | ERV1          | LTR           |                                                |               |               |                                           |               |               | LTR16B                                          | ERV1          | LTR           |
| MER87                                   | ERV1          | LTR           |                                                |               |               |                                           |               |               | LTR57                                           | ERV1          | LTR           |
| MLT1A                                   | ERV1-MaLR     | LTR           |                                                |               |               |                                           |               |               | LTR82B                                          | ERV1          | LTR           |
| MLT1A-int                               | ERV1-MaLR     | LTR           |                                                |               |               |                                           |               |               | MER4B-int                                       | ERV1          | LTR           |
| MLT1E1                                  | ERV1-MaLR     | LTR           |                                                |               |               |                                           |               |               | MER52A                                          | ERV1          | LTR           |
| MLT1F1-int                              | ERV1-MaLR     | LTR           |                                                |               |               |                                           |               |               | MER89-int                                       | ERV1          | LTR           |
| MLT1F                                   | ERV1-MaLR     | LTR           |                                                |               |               |                                           |               |               | MLT1G3-int                                      | ERV1-MaLR     | LTR           |
| MLT1H1-int                              | ERV1-MaLR     | LTR           |                                                |               |               |                                           |               |               | (ATAGG)n                                        | Simple_repeat | Simple_repeat |
| MLT1H-int                               | ERV1-MaLR     | LTR           |                                                |               |               |                                           |               |               | (ATGTG)n                                        | Simple_repeat | Simple_repeat |
| MLT1J1-int                              | ERV1-MaLR     | LTR           |                                                |               |               |                                           |               |               | (CACAT)n                                        | Simple_repeat | Simple_repeat |
| MSTB2-int                               | ERV1-MaLR     | LTR           |                                                |               |               |                                           |               |               | (CACCT)n                                        | Simple_repeat | Simple_repeat |
| MSTB-int                                | ERV1-MaLR     | LTR           |                                                |               |               |                                           |               |               | (CACTA)n                                        | Simple_repeat | Simple_repeat |
| PrimLTR79                               | ERV1          | LTR           |                                                |               |               |                                           |               |               | (CATAn)n                                        | Simple_repeat | Simple_repeat |
| THE1A                                   | ERV1-MaLR     | LTR           |                                                |               |               |                                           |               |               | (CATAT)n                                        | Simple_repeat | Simple_repeat |
| ACRO1                                   | acro          | Satellite     |                                                |               |               |                                           |               |               | (CATTG)n                                        | Simple_repeat | Simple_repeat |
| ALR/Alpha                               | centr         | Satellite     |                                                |               |               |                                           |               |               | (TCTAn)n                                        | Simple_repeat | Simple_repeat |
| CER                                     | Satellite     | Satellite     |                                                |               |               |                                           |               |               | tRNA-Ile-ATA                                    | tRNA          | tRNA          |
| SATR2                                   | Satellite     | Satellite     |                                                |               |               |                                           |               |               | UCON5                                           | Unknown       | Unknown       |
| (CAGT)n                                 | Simple_repeat | Simple_repeat |                                                |               |               |                                           |               |               | UCON6                                           | Unknown       | Unknown       |
| (CTCA)n                                 | Simple_repeat | Simple_repeat |                                                |               |               |                                           |               |               |                                                 |               |               |

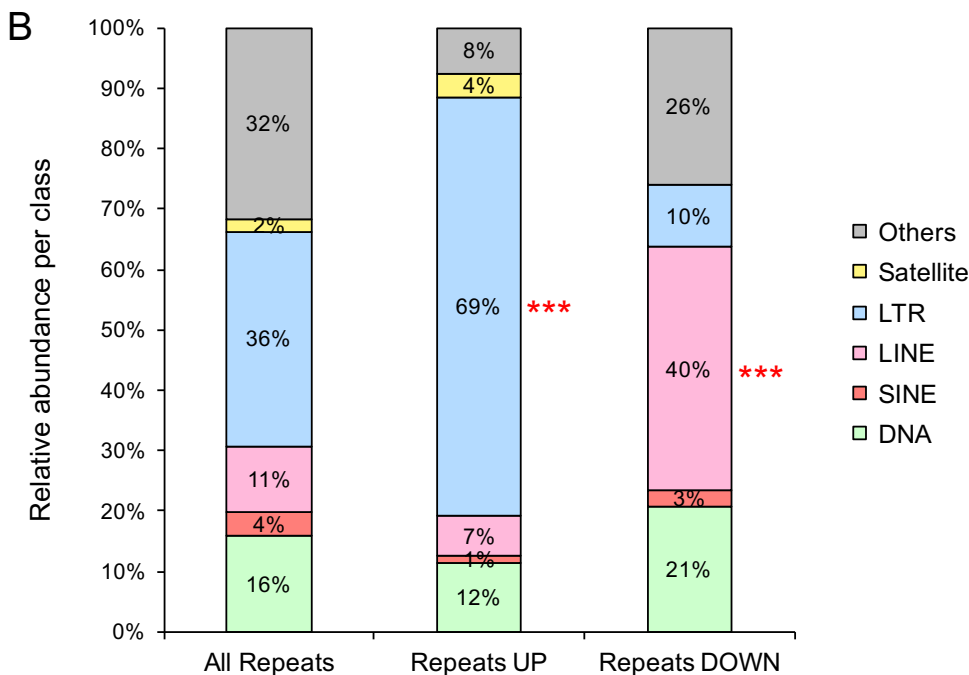

Supplement: pone.0200783.s001.pdf [file pone.0200783.s001.pdf]
