# Supplementary material for: Amino acid deprivation triggers a novel GCN2-independent response leading to the transcriptional reactivation of non-native DNA sequences
Source: PubMed Central journal article supplement (PMC6051655; doi:10.1371/journal.pone.0200783), 2018-07-18
Supplement: pone.0200783.s002.pdf [file pone.0200783.s002.pdf]

# S2 Fig

A

| Repeat Class           | Cluster 1 |          | Cluster 2 |          | Cluster 3 |          | Cluster 4 |          |
|------------------------|-----------|----------|-----------|----------|-----------|----------|-----------|----------|
|                        | OR        | p-value  | OR        | p-value  | OR        | p-value  | OR        | p-value  |
| DNA                    | 0,32      | 5,31E-02 | 0,91      | 1,00E+00 | 1,65      | 2,34E-01 | 0,84      | 8,56E-01 |
| DNA?                   | 0,00      | 1,00E+00 | 0,00      | 1,00E+00 | 2,11      | 3,94E-01 | 0,00      | 1,00E+00 |
| <b>LINE</b>            | 0,67      | 6,53E-01 | 0,35      | 5,09E-01 | 1,58      | 3,77E-01 | 4,83      | 1,91E-09 |
| <b>LTR</b>             | 2,13      | 3,50E-04 | 1,64      | 1,20E-01 | 0,55      | 2,51E-01 | 0,37      | 6,63E-03 |
| rRNA                   | 0,00      | 1,00E+00 | 0,00      | 1,00E+00 | 15,50     | 8,41E-02 | 0,00      | 1,00E+00 |
| <b>Satellite</b>       | 4,26      | 2,26E-02 | 2,25      | 3,77E-01 | 0,00      | 1,00E+00 | 0,00      | 1,00E+00 |
| Simple_repeat          | 0,16      | 1,46E-03 | 0,17      | 4,58E-02 | 1,05      | 8,32E-01 | 0,69      | 3,38E-01 |
| SINE                   | 0,00      | 2,58E-01 | 0,00      | 1,00E+00 | 0,93      | 1,00E+00 | 0,47      | 7,19E-01 |
| snRNA                  | 0,00      | 1,00E+00 | 0,00      | 1,00E+00 | 3,88      | 2,48E-01 | 0,00      | 1,00E+00 |
| tRNA                   | 0,00      | 1,69E-01 | 2,46      | 1,45E-01 | 0,00      | 6,35E-01 | 0,38      | 5,13E-01 |
| Unknown                | 0,00      | 6,27E-01 | 1,72      | 4,56E-01 | 1,55      | 4,90E-01 | 1,58      | 3,81E-01 |
| Repeat Family          | Cluster 1 |          | Cluster 2 |          | Cluster 3 |          | Cluster 4 |          |
| Enrichment in Clusters | OR        | p-value  | OR        | p-value  | OR        | p-value  | OR        | p-value  |
| acro                   | 24,47     | 7,82E-02 | 0,00      | 1,00E+00 | 0,00      | 1,00E+00 | 0,00      | 1,00E+00 |
| Alu                    | 0,00      | 4,02E-01 | 0,00      | 1,00E+00 | 1,13      | 5,97E-01 | 0,58      | 1,00E+00 |
| centr                  | 4,08      | 2,48E-01 | 8,61      | 1,30E-01 | 0,00      | 1,00E+00 | 0,00      | 1,00E+00 |
| CR1                    | 0,00      | 1,00E+00 | 0,00      | 1,00E+00 | 6,20      | 5,27E-02 | 0,00      | 1,00E+00 |
| DNA                    | 0,32      | 5,31E-02 | 0,91      | 1,00E+00 | 1,65      | 2,34E-01 | 0,84      | 8,56E-01 |
| DNA?                   | 0,00      | 1,00E+00 | 0,00      | 1,00E+00 | 2,11      | 3,94E-01 | 0,00      | 1,00E+00 |
| Dong-R4                | 0,00      | 1,00E+00 | 0,00      | 1,00E+00 | 0,00      | 1,00E+00 | 23,64     | 8,07E-02 |
| <b>ERV1</b>            | 2,35      | 1,11E-03 | 1,59      | 2,44E-01 | 0,54      | 4,65E-01 | 0,36      | 4,84E-02 |
| <b>ERVK</b>            | 0,66      | 1,00E+00 | 4,19      | 4,62E-02 | 0,00      | 1,00E+00 | 0,00      | 3,98E-01 |
| <b>ERVL</b>            | 2,02      | 2,46E-02 | 1,42      | 4,10E-01 | 0,51      | 5,72E-01 | 0,52      | 3,07E-01 |
| ERVL?                  | 0,00      | 1,00E+00 | 25,83     | 5,78E-02 | 0,00      | 1,00E+00 | 0,00      | 1,00E+00 |
| <b>ERVL-MaLR</b>       | 3,06      | 4,33E-03 | 0,65      | 1,00E+00 | 0,58      | 1,00E+00 | 0,30      | 3,68E-01 |
| Gypsy                  | 3,86      | 5,69E-02 | 0,00      | 1,00E+00 | 0,00      | 1,00E+00 | 0,00      | 1,00E+00 |
| <b>Gypsy?</b>          | 8,16      | 3,84E-02 | 0,00      | 1,00E+00 | 0,00      | 1,00E+00 | 0,00      | 1,00E+00 |
| hAT                    | 0,67      | 7,96E-01 | 1,42      | 4,77E-01 | 1,28      | 7,29E-01 | 0,87      | 1,00E+00 |
| hAT-Blackjack          | 0,00      | 1,00E+00 | 0,00      | 1,00E+00 | 5,81      | 1,79E-01 | 0,00      | 1,00E+00 |
| hAT-Charlie            | 0,72      | 1,00E+00 | 1,52      | 6,43E-01 | 1,37      | 6,59E-01 | 0,70      | 1,00E+00 |
| hAT-Tip100             | 1,02      | 1,00E+00 | 2,15      | 3,89E-01 | 0,00      | 1,00E+00 | 1,97      | 2,91E-01 |
| <b>L1</b>              | 0,80      | 1,00E+00 | 0,42      | 7,21E-01 | 0,38      | 5,08E-01 | 5,62      | 1,77E-10 |
| L2                     | 0,00      | 1,00E+00 | 0,00      | 1,00E+00 | 11,63     | 1,04E-01 | 0,00      | 1,00E+00 |
| <b>LTR</b>             | 2,13      | 3,50E-04 | 1,64      | 1,20E-01 | 0,55      | 2,51E-01 | 0,37      | 6,63E-03 |
| PiggyBac               | 0,00      | 1,00E+00 | 0,00      | 1,00E+00 | 0,00      | 1,00E+00 | 3,94      | 2,55E-01 |
| rRNA                   | 0,00      | 1,00E+00 | 0,00      | 1,00E+00 | 15,50     | 8,41E-02 | 0,00      | 1,00E+00 |
| RTE                    | 0,00      | 1,00E+00 | 0,00      | 1,00E+00 | 11,63     | 1,04E-01 | 0,00      | 1,00E+00 |
| <b>Satellite</b>       | 4,26      | 2,26E-02 | 2,25      | 3,77E-01 | 0,00      | 1,00E+00 | 0,00      | 1,00E+00 |
| Simple_repeat          | 0,16      | 1,46E-03 | 0,17      | 4,58E-02 | 1,05      | 8,32E-01 | 0,69      | 3,38E-01 |
| SINE                   | 0,00      | 2,58E-01 | 0,00      | 1,00E+00 | 0,93      | 1,00E+00 | 0,47      | 7,19E-01 |
| snRNA                  | 0,00      | 1,00E+00 | 0,00      | 1,00E+00 | 3,88      | 2,48E-01 | 0,00      | 1,00E+00 |
| TcMar                  | 0,00      | 1,08E-01 | 0,73      | 1,00E+00 | 2,62      | 8,59E-02 | 1,00      | 1,00E+00 |
| <b>TcMar-Tigger</b>    | 0,00      | 2,60E-01 | 0,99      | 1,00E+00 | 3,58      | 3,66E-02 | 0,91      | 1,00E+00 |
| tRNA                   | 0,00      | 1,69E-01 | 2,46      | 1,45E-01 | 0,00      | 6,35E-01 | 0,38      | 5,13E-01 |
| Unknown                | 0,00      | 6,27E-01 | 1,72      | 4,56E-01 | 1,55      | 4,90E-01 | 1,58      | 3,81E-01 |

OR = Odds-Ratio (>1, enriched; <1, depleted); p-value = Fisher exact test  
Green = Significantly Enriched  
Red = Significantly Depleted  
Repeat name in bold = significantly enriched in at least one cluster  
Only repeat families that are differentially expressed in one or more clusters are shown

B

| Repeat Class | UP-regulated repeats |         | DOWN-regulated repeats |         |
|--------------|----------------------|---------|------------------------|---------|
|              | OR                   | p-value | OR                     | p-value |
| DNA          | 0,7125               | 0,3233  | 1,4601                 | 0,1959  |
| SINE         | 0,2665               | 0,2530  | 0,7472                 | 1,0000  |
| <b>LINE</b>  | 0,6433               | 0,3101  | 7,2504                 | 0,0000  |
| <b>LTR</b>   | 4,6247               | 0,0000  | 0,2076                 | 0,0000  |
| Satellite    | 2,8884               | 0,0702  | 0,0000                 | 0,6287  |
| Others       | 0,1818               | 0,0000  | 0,7870                 | 0,4458  |

OR = Odds-Ratio (>1, enriched; <1, depleted); p-value = Fisher exact test  
Green = Significantly Enriched  
Red = Significantly Depleted  
Repeat name in bold = significantly enriched in at least one group (UP/DOWN)  
Only main repeat classes are shown; Others includes SVA, simple repeats, snRNA, and tRNAs
