# Supplementary material for: Amino acid deprivation triggers a novel GCN2-independent response leading to the transcriptional reactivation of non-native DNA sequences
Source: PubMed Central journal article supplement (PMC6051655; doi:10.1371/journal.pone.0200783), 2018-07-18

# S4 Fig

**A** C2C12-GFP cells

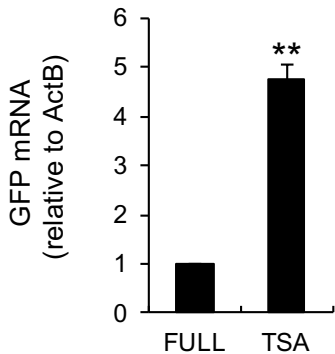

**B** C2C12-GFP cells

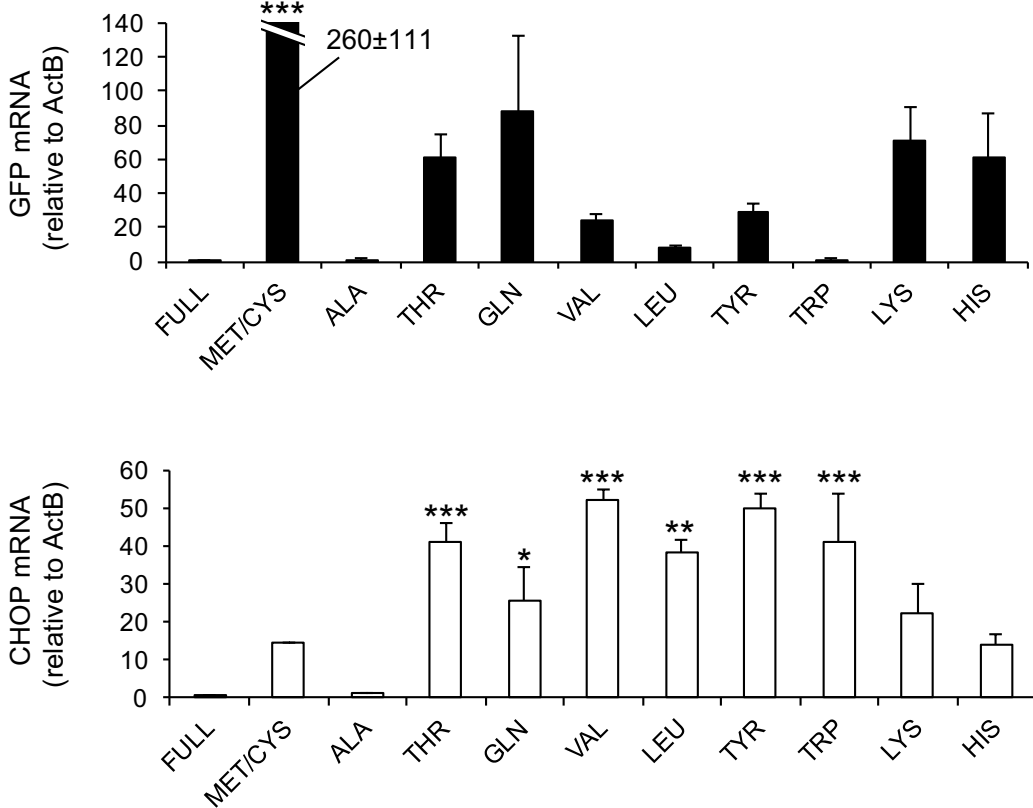

Supplement: pone.0200783.s004.pdf [file pone.0200783.s004.pdf]
